# Supplementary material for: An Ontology Systems Approach on Human Brain Expression and Metaproteomics
Source: PubMed Central journal article supplement (PMC5852110; doi:10.3389/fmicb.2018.00406), 2018-03-08
Supplement: Image1.pdf [file Image1.pdf]

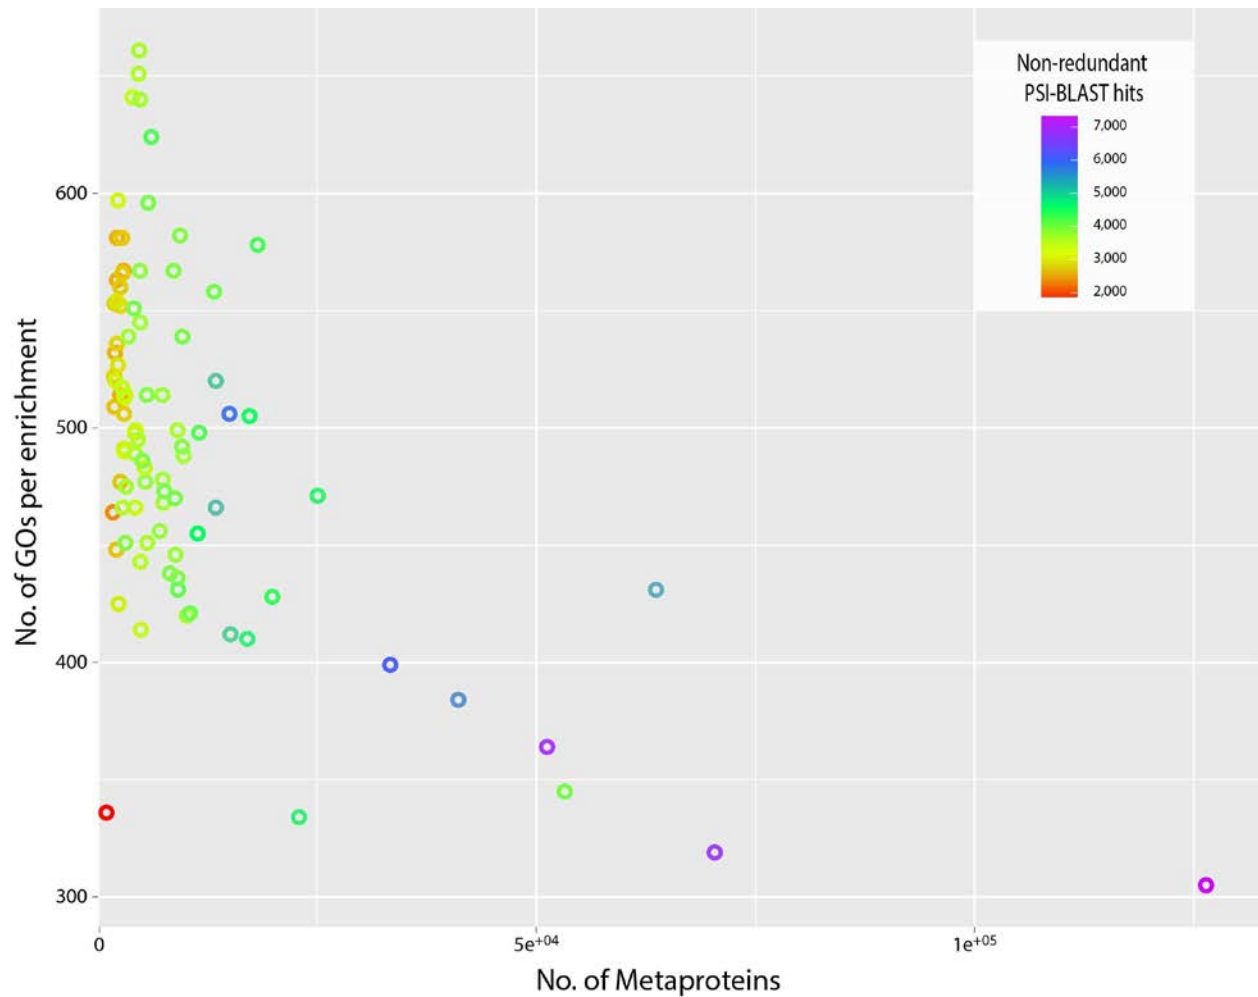

Figure S1. Scatterplot of the number of metaproteins of each taxon (92) with the number of non-redundant human proteins found by the PSI-blast algorithm using the metaproteins. The color-coded information represents the number of Gene ontologies (GOs) found by the enrichment analysis.

Flores-Saiffe, et al. An ontological systems approach on human brain expression and metaproteomics. *Frontiers in Microbiology* (2017).
